# Supplementary material for: A Physic Nut Stress-Responsive HD-Zip Transcription Factor, JcHDZ07, Confers Enhanced Sensitivity to Salinity Stress in Transgenic Arabidopsis
Source: Front Plant Sci. 2019 Jul 17;10:942. doi: 10.3389/fpls.2019.00942 (PMC6652468; doi:10.3389/fpls.2019.00942)
Supplement: TABLE S1 — Primers used in this study. [file Table_1.XLSX]

## Sheet: Sheet1
Table S1. Primers used in this study
Genes	Accession No. in GenBank	Forward (5`→3`)	Reverse (5`→3`)	Restriction sites
Gene cloning
JcHDZ07	JCGZ_09617	GGGGTACC AGATGGAGTCTGGACGCCT	GCTCTAGA GCTCCTTAAGACCATACCCAC	Kpn I/ Xba I
Subcellular Localization
JcHDZ07	JCGZ_09617	CGGAATTC GAATCACTGAAACTCGCCG	GGGGTACC AGACCATACCCACCATCCTAAG	EcoR I/Kpn I
Semi-quantitative RT-PCR
JcHDZ07	JCGZ_09617	AAAAGACCGACTACTCACTG	AAGACCATACCCACCATC
AtActin2	AT3G18780	GCACCCTGTTCTTCTTACCG	AACCCTCGTAGATTGGCACA
qRT-PCR
P5CS1	AT2G39800	AGGCTTGCACTGTTGAAGTTGTAG	CTTCGTGATCCTCTGTCACAATG
AtDREB2A	AT5G05410	GACCTAAATGGCGACGATGT	TCGAGCTGAAACGGAGGTAT
AtHKT1;1	AT4G10310	GGCTGCAAAGACGCGAGTT	AGACGAGGGGTAAAGAATCCA
AtSOS1	AT2G01980	AGTGTAAGTTTCGGTGGGATC	CACGCATGTTTACGGGTTTC
AtNHX1	AT5G27150	AGCCTTCAGGGAACCACAAT	CTCCAAAGACGGGTCGCATG
AtAPX1	AT1G07890	CTCTGGGACGATGCCACAAG	CTCGACCAAAGGACGGAAAA
JcHDZ07	JCGZ_09617	CCAAGGTTGAGGACCGTCTAAG	GTCGTCATCCTCTGATTGCACA
AtActin2	AT3G18780	GCACCCTGTTCTTCTTACCG	AACCCTCGTAGATTGGCACA
JcActin	JQ806331	TAATGGTCCCTCTGGATGTG	AGAAAAGAAAAGAAAAAAGCAGC
